# Supplementary material for: Brokering System Change: A Logic Model of an Intermediary-Purveyor Organization for Behavioral Health Care
Source: Atypon-hosted journal article supplement (doi:10.1176/appi.ps.202100425), 2022-02-23
Supplement: appi.ps.202100425.ds001.pdf [file appi.ps.202100425.ds001.pdf]

## Intermediary/Purveyor Organization (IPO) for Behavioral Health Care Logic Model

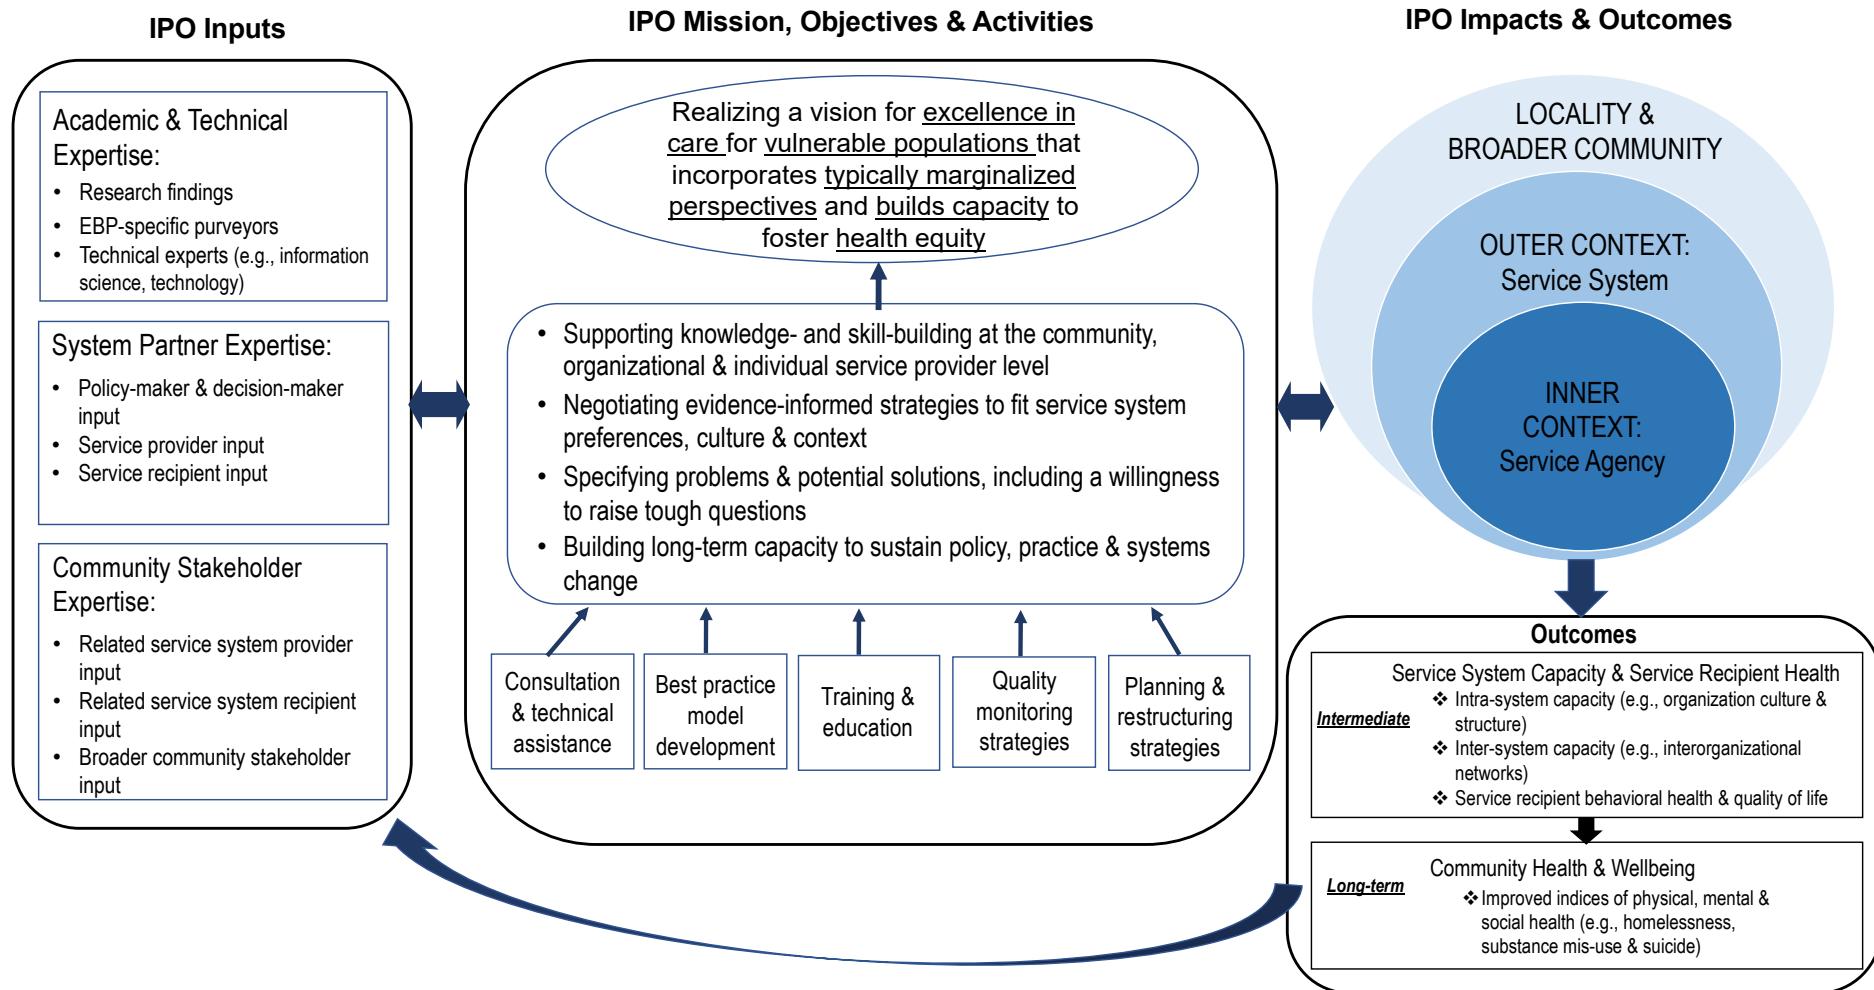

Model guided by: Damschroder et al., 2009; Fixsen et al., 2005; Franks & Bory, 2015; Proctor et al., 2019.
